# Supplementary material for: Glucosinolates and Isothiocyantes in Processed Rapeseed Determined by HPLC-DAD-qTOF
Source: MDPI journal article supplement (doi:10.3390/plants10112548), 2021-11-22
Supplement: s1 [file s1]

# Supplementary

**Table S1.** The molecular formulas and molar masses of the glucosinolates that were selected according to Tolra et al., 2000 and Metlin Metabolites dataset for identification in the samples. The underlined compounds were identified in this study selected samples.

| Name                                                          | Formula                                                         | M (g/mol)    | Theoretical mass | Measured monoisotopic mass | Error (ppm) |
|---------------------------------------------------------------|-----------------------------------------------------------------|--------------|------------------|----------------------------|-------------|
| 3-Methylsulfinylpropyl glucosinolate                          | C <sub>11</sub> H <sub>20</sub> NO <sub>10</sub> S <sub>3</sub> | 422.5        |                  |                            |             |
| 4-Methylsulfinylbutyl glucosinolate                           | C <sub>12</sub> H <sub>22</sub> NO <sub>10</sub> S <sub>3</sub> | 436.5        |                  |                            |             |
| 6-Methylsulfinylhexyl glucosinolate                           | C <sub>14</sub> H <sub>26</sub> NO <sub>10</sub> S <sub>3</sub> | 464.6        |                  |                            |             |
| 7-Methylsulfinylheptyl glucosinolate                          | C <sub>15</sub> H <sub>28</sub> NO <sub>10</sub> S <sub>3</sub> | 478.6        |                  |                            |             |
| <u>4-Methyltiobutyl glucosinolate</u>                         | <u>C<sub>6</sub>H<sub>11</sub>NS<sub>2</sub></u>                | <u>421.5</u> | <u>421.0535</u>  | <u>421.0544</u>            | <u>2.26</u> |
| 4-Hydroxybutyl glucosinolate                                  | C <sub>11</sub> H <sub>21</sub> NO <sub>10</sub> S <sub>2</sub> | 391.1        |                  |                            |             |
| <u>2-Propenyl glucosinolate</u>                               |                                                                 |              |                  |                            |             |
| <u>SINIGRIN</u>                                               | <u>C<sub>10</sub>H<sub>17</sub>NO<sub>9</sub>S<sub>2</sub></u>  | <u>359.4</u> | <u>359.0345</u>  | <u>359.0358</u>            | <u>3.79</u> |
| <u>3-Butenyl glucosinolate</u>                                |                                                                 |              |                  |                            |             |
| <u>GLUCONAPIN</u>                                             | <u>C<sub>11</sub>H<sub>19</sub>NO<sub>9</sub>S<sub>2</sub></u>  | <u>373.4</u> | <u>373.0501</u>  | <u>373.0512</u>            | <u>2.92</u> |
| <u>2-Hydroxy-3-butenyl glucosinolate</u>                      |                                                                 |              |                  |                            |             |
| <u>PROGOITRIN</u> or<br>(2R)-2-Hydroxybut-3-enylglucosinolate |                                                                 |              |                  |                            |             |
| <u>EPIPROGOITRIN</u>                                          | <u>C<sub>11</sub>H<sub>19</sub>NO<sub>10</sub>S<sub>2</sub></u> | <u>389.4</u> | <u>389.0450</u>  | <u>389.0462</u>            | <u>3.11</u> |
| <u>2-Hydroxy-4-pentenyl glucosinolate</u>                     |                                                                 |              |                  |                            |             |

|                                        |                                                                               |              |                 |                 |             |
|----------------------------------------|-------------------------------------------------------------------------------|--------------|-----------------|-----------------|-------------|
| <u>GLUCONAPOLIFERIN</u>                | <u>C<sub>12</sub>H<sub>21</sub>NO<sub>10</sub>S<sub>2</sub></u>               | <u>403.4</u> | <u>403.0607</u> | <u>403.0621</u> | <u>3.44</u> |
| Benzyl glucosinolate                   | C <sub>14</sub> H <sub>18</sub> NO <sub>9</sub> S <sub>2</sub>                | 408.4        |                 |                 |             |
| <u>p-Hydroxybenzyl glucosinolate</u>   |                                                                               |              |                 |                 |             |
| <u>SINALBIN</u>                        | <u>C<sub>14</sub>H<sub>19</sub>NO<sub>10</sub>S<sub>2</sub></u>               | <u>425.4</u> | <u>425.0450</u> | <u>425.0458</u> | <u>1.81</u> |
| <u>2-Phenylethyl glucosinolate</u>     |                                                                               |              |                 |                 |             |
| <u>GLUCONASTURTIIN</u>                 | <u>C<sub>15</sub>H<sub>21</sub>NO<sub>9</sub>S<sub>2</sub></u>                | <u>423.5</u> | <u>423.0658</u> | <u>423.0670</u> | <u>2.87</u> |
| 3-Indolylmethyl glucosinolate          |                                                                               |              |                 |                 |             |
| GLUCOBRASSICIN                         | C <sub>16</sub> H <sub>20</sub> N <sub>2</sub> O <sub>9</sub> S <sub>2</sub>  | 448.5        |                 |                 |             |
| (N-Sulfoindol-3-yl)methylglucosinolate | C <sub>16</sub> H <sub>20</sub> N <sub>2</sub> O <sub>12</sub> S <sub>3</sub> | 528.0        |                 |                 |             |
| 4-Mercaptobutyl glucosinolate          | C <sub>11</sub> H <sub>21</sub> NO <sub>9</sub> S <sub>3</sub>                | 407.0        |                 |                 |             |
| 2-Hydroxypropyl glucosinolate          | C <sub>10</sub> H <sub>19</sub> NO <sub>10</sub> S <sub>2</sub>               | 377.0        |                 |                 |             |
| Butyl glucosinolate                    | C <sub>11</sub> H <sub>21</sub> NO <sub>9</sub> S <sub>2</sub>                | 375.1        |                 |                 |             |
| 6-Heptenyl glucosinolate               | C <sub>14</sub> H <sub>25</sub> NO <sub>9</sub> S <sub>2</sub>                | 415.1        |                 |                 |             |
| Hexyl glucosinolate                    | C <sub>13</sub> H <sub>25</sub> NO <sub>9</sub> S <sub>2</sub>                | 403.1        |                 |                 |             |
| 3-Phenylpropyl glucosinolate           | C <sub>16</sub> H <sub>23</sub> NO <sub>9</sub> S <sub>2</sub>                | 437.1        |                 |                 |             |
| <u>Methylpentyl glucosinolate</u>      | <u>C<sub>13</sub>H<sub>25</sub>NO<sub>9</sub>S<sub>2</sub></u>                | <u>403.1</u> | <u>403.0971</u> | <u>403.0994</u> | <u>5.74</u> |
| 2-Methylbutyl glucosinolate            | C <sub>12</sub> H <sub>23</sub> NO <sub>9</sub> S <sub>2</sub>                | 389.1        |                 |                 |             |
| <u>2-Methylpropyl glucosinolate</u>    |                                                                               |              | <u>375.0658</u> | <u>375.0668</u> | <u>2.87</u> |
| <u>/ Butyl glucosinolate</u>           | <u>C<sub>11</sub>H<sub>21</sub>NO<sub>9</sub>S<sub>2</sub></u>                | <u>375.1</u> |                 |                 |             |

|                                                       |                                                                 |              |                 |                 |             |
|-------------------------------------------------------|-----------------------------------------------------------------|--------------|-----------------|-----------------|-------------|
| 8-Methylthiooctyl glucosinolate                       | C <sub>16</sub> H <sub>31</sub> NO <sub>9</sub> S <sub>3</sub>  | 477.1        |                 |                 |             |
| 7-Methylthioheptyl glucosinolate                      | C <sub>15</sub> H <sub>29</sub> NO <sub>9</sub> S <sub>3</sub>  | 463.1        |                 |                 |             |
| 4-Methylthiobutyl-desulfoglucosinolate                | C <sub>12</sub> H <sub>23</sub> NO <sub>6</sub> S <sub>2</sub>  | 341.1        |                 |                 |             |
| 3-Methylthiopropyl-desulfoglucosinolate               | C <sub>11</sub> H <sub>21</sub> NO <sub>6</sub> S <sub>2</sub>  | 327.1        |                 |                 |             |
| Hydroxybenzyl-desulfoglucosinolate                    | C <sub>14</sub> H <sub>19</sub> NO <sub>7</sub> S               | 345.1        |                 |                 |             |
| Indolylmethyl-desulfoglucosinolate                    | C <sub>16</sub> H <sub>20</sub> N <sub>2</sub> O <sub>6</sub> S | 368.1        |                 |                 |             |
| <u>4-Pentenyl glucosinolate</u>                       |                                                                 |              |                 |                 |             |
| <u>GLUCOBRASSICANAPIN</u>                             | <u>C<sub>12</sub>H<sub>21</sub>NO<sub>9</sub>S<sub>2</sub></u>  | <u>387.1</u> | <u>387.0658</u> | <u>387.0671</u> | <u>3.38</u> |
| 3-Methylpentyl glucosinolate                          | C <sub>13</sub> H <sub>25</sub> NO <sub>9</sub> S <sub>2</sub>  | 403.1        |                 |                 |             |
| (2R)-2-Hydroxy-2-(4-hydroxyphenyl)ethyl glucosinolate | C <sub>15</sub> H <sub>21</sub> NO <sub>11</sub> S <sub>2</sub> | 455.1        |                 |                 |             |
| (2R)-2-Hydroxy-2-phenylethyl glucosinolate            | C <sub>15</sub> H <sub>21</sub> NO <sub>10</sub> S <sub>2</sub> | 439.1        |                 |                 |             |
| 2-(Methylthio)ethyl glucosinolate                     | C <sub>10</sub> H <sub>19</sub> NO <sub>9</sub> S <sub>3</sub>  | 393.0        |                 |                 |             |
| 6-(Methylthio)hexyl glucosinolate                     | C <sub>14</sub> H <sub>27</sub> NO <sub>9</sub> S <sub>3</sub>  | 449.1        |                 |                 |             |
| 6-(Methylsulfonyl)hexyl glucosinolate                 | C <sub>14</sub> H <sub>27</sub> NO <sub>11</sub> S <sub>3</sub> | 481.1        |                 |                 |             |
| 3-Methylbutyl glucosinolate                           | C <sub>12</sub> H <sub>23</sub> NO <sub>9</sub> S <sub>2</sub>  | 389.1        |                 |                 |             |
| 2-Hydroxypentyl glucosinolate                         | C <sub>12</sub> H <sub>23</sub> NO <sub>10</sub> S <sub>2</sub> | 405.1        |                 |                 |             |
| Pentyl glucosinolate                                  | C <sub>12</sub> H <sub>23</sub> NO <sub>9</sub> S <sub>2</sub>  | 389.1        |                 |                 |             |
| 4-Phenylbutyl glucosinolate                           | C <sub>17</sub> H <sub>25</sub> NO <sub>9</sub> S <sub>2</sub>  | 451.1        |                 |                 |             |
| 5-Hexenyl glucosinolate                               | C <sub>13</sub> H <sub>23</sub> NO <sub>9</sub> S <sub>2</sub>  | 401.1        |                 |                 |             |

Napoleiferin

C<sub>6</sub>H<sub>9</sub>NOS 143.2

5-methylsulfinylpentyl glucosinolate

GLUCOALYSSIN C<sub>13</sub>H<sub>25</sub>NO<sub>10</sub>S<sub>3</sub> 451.5 451.0641 451.0658 3.8

1-Methoxy-3-indolylmethyl glucosinolate

NEOGLUCOBRASSICIN C<sub>17</sub>H<sub>22</sub>N<sub>2</sub>O<sub>10</sub>S<sub>2</sub> 478.5 478.0716 478.0729 2.8

4-Hydroxy-3-indolylmethylglucosinolate

4-HYDROXYGLUCOBRASSICIN C<sub>16</sub>H<sub>20</sub>N<sub>2</sub>O<sub>10</sub>S<sub>2</sub> 464.5

**Table S2.** Results of determination of glucosinolates and isothiocyanates in CPR, CPR -2, CPR-3, CPR-4, HPR – 1, HPR – 2 and HPR – 3.

| Name of the compound                           | Formula                                                         | M        | [M-H] <sup>-</sup> / [M-H] <sup>+</sup> | Confirmation<br>n<br>Fragments | Fragment<br>96 / 97<br>ratio | Type of<br>Sample                                                     | Conc.<br>(mg/kg)                                                              |
|------------------------------------------------|-----------------------------------------------------------------|----------|-----------------------------------------|--------------------------------|------------------------------|-----------------------------------------------------------------------|-------------------------------------------------------------------------------|
| 2-Hydroxy-3-butenyl glucosinolate (progoitrin) | C <sub>11</sub> H <sub>19</sub> NO <sub>10</sub> S <sub>2</sub> | 389.0460 | 388.0389                                | 96.9595<br>259.0183            | 1 : 2                        | CPR<br>HPR – 1<br>HPR – 2<br>HPR – 3<br>CPR – 2<br>CPR – 3<br>CPR – 4 | 1014 ± 56<br>1600 ± 160<br>1720 ± 10<br>2565 ± 3.0<br>< LOD<br>< LOD<br>< LOD |
| 2-Propenyl glucosinolate (sinigrin)            | C <sub>10</sub> H <sub>17</sub> NO <sub>9</sub> S <sub>2</sub>  | 359.0287 | 358.0287                                | 96.9586<br>259.0012            | 1 : 2                        | CPR<br>HPR – 1<br>HPR – 2                                             | 3.6 ± 0.09<br>< LOD<br>< LOD                                                  |

|                                                          |                                                                 |          |          |                     |       |                                                                       |                                                                                 |
|----------------------------------------------------------|-----------------------------------------------------------------|----------|----------|---------------------|-------|-----------------------------------------------------------------------|---------------------------------------------------------------------------------|
|                                                          |                                                                 |          |          |                     |       | HPR – 3<br>CPR – 2<br>CPR – 3<br>CPR – 4                              | < LOD<br>< LOD<br>< LOD<br>< LOD                                                |
| <i>p</i> -Hydroxybenzyl glucosinolate (sinalbin)         | C <sub>14</sub> H <sub>19</sub> NO <sub>10</sub> S <sub>2</sub> | 425.0460 | 424.0387 | 96.9595<br>259.0106 | 1 : 4 | CPR<br>HPR – 1<br>HPR – 2<br>HPR – 3<br>CPR – 2<br>CPR – 3<br>CPR – 4 | 21.7 ± 2.2<br>< LOD<br>< LOD<br>< LOD<br>< LOD<br>< LOD<br>< LOD                |
| 2-Hydroxy-4-pentenyl glucosinolate<br>(gluconapoliferin) | C <sub>12</sub> H <sub>21</sub> NO <sub>10</sub> S <sub>2</sub> | 403.0620 | 402.0549 | 96.9602<br>259.0130 | 1 : 3 | CPR<br>HPR – 1<br>HPR – 2<br>HPR – 3<br>CPR – 2<br>CPR – 3<br>CPR – 4 | 114.8* ± 8.0<br>28.3* ± 0.1<br>54* ± 5<br>3.0* ± 0.3<br>< LOD<br>< LOD<br>< LOD |
| Glucoalyssin                                             | C <sub>13</sub> H <sub>25</sub> NO <sub>10</sub> S <sub>3</sub> | 451.0660 | 450.0586 | 96.9602<br>259.0079 | 1 : 2 | CPR<br>HPR – 1<br>HPR – 2<br>HPR – 3<br>CPR – 2<br>CPR – 3            | 52.1* ± 0.04<br>< LOD<br>35.4* ± 0.3<br>52* ± 0.3<br>< LOD<br>< LOD             |

|                                                    |                                                                |          |          |                     |       |                                                                       |                                                                                   |
|----------------------------------------------------|----------------------------------------------------------------|----------|----------|---------------------|-------|-----------------------------------------------------------------------|-----------------------------------------------------------------------------------|
|                                                    |                                                                |          |          |                     |       | CPR – 4                                                               | <LOD                                                                              |
| 3-Butenyl glucosinolate (gluconapin)               | C <sub>11</sub> H <sub>19</sub> NO <sub>9</sub> S <sub>2</sub> | 373.0510 | 372.0439 | 96.9601<br>259.0146 | 1 : 3 | CPR<br>HPR – 1<br>HPR – 2<br>HPR – 3<br>CPR – 2<br>CPR – 3<br>CPR – 4 | 2413 ± 27<br>1479 ± 5.8<br>2024 ± 2.7<br>2209 ± 29<br><LOD<br><LOD<br><LOD        |
| 2-methylpropyl glucosinolate / butyl glucosinolate | C <sub>11</sub> H <sub>21</sub> NO <sub>9</sub> S <sub>2</sub> | 375.0670 | 374.0598 | 96.9523<br>259.0247 | 1 : 3 | CPR<br>HPR – 1<br>HPR – 2<br>HPR – 3<br>CPR – 2<br>CPR – 3<br>CPR – 4 | 16.3* ± 1.1<br>5.3* ± 0.05<br>4.8* ± 0.03<br>5.3* ± 0.1<br><LOD<br><LOD<br><LOD   |
| 4-Pentenyl glucosinolate<br>(glucobrassicinapin)   | C <sub>12</sub> H <sub>21</sub> NO <sub>9</sub> S <sub>2</sub> | 387.0670 | 386.0598 | 96.9601<br>259.0124 | 1 : 3 | CPR<br>HPR – 1<br>HPR – 2<br>HPR – 3<br>CPR – 2<br>CPR – 3<br>CPR – 4 | 23.7* ± 1.7<br>16.5* ± 0.08<br>64.0* ± 1.0<br>60.9* ± 0.2<br><LOD<br><LOD<br><LOD |
| 4-Methyltiobutyl glucosinolate                     | C <sub>12</sub> H <sub>23</sub> NO <sub>9</sub> S <sub>3</sub> | 421.0540 | 420.0472 | 96.9602<br>259.0137 | 1 : 3 | CPR<br>HPR – 1<br>HPR – 2<br>HPR – 3                                  | < LOQ<br>< LOD<br>< LOD<br><LOD                                                   |

|                                               |                                                                               |          |          |                                 |       |                                                                       |                                                                         |
|-----------------------------------------------|-------------------------------------------------------------------------------|----------|----------|---------------------------------|-------|-----------------------------------------------------------------------|-------------------------------------------------------------------------|
|                                               |                                                                               |          |          |                                 |       | CPR – 2<br>CPR – 3<br>CPR – 4                                         | <LOD<br><LOD<br><LOD                                                    |
| 2-Phenylethyl glucosinolate (gluconasturtiin) | C <sub>15</sub> H <sub>21</sub> NO <sub>9</sub> S <sub>2</sub>                | 423.0670 | 422.0597 | 96.9608<br>259.0075             | 1 : 3 | CPR<br>HPR – 1<br>HPR – 2<br>HPR – 3<br>CPR – 2<br>CPR – 3<br>CPR – 4 | 22.0 ± 0.8<br>< LOD<br>11.3 ± 0.3<br>28.9 ± 0.4<br><LOD<br><LOD<br><LOD |
| Methylpentyl glucosinolate                    | C <sub>13</sub> H <sub>25</sub> NO <sub>9</sub> S <sub>2</sub>                | 403,099  | 402,0913 | 96.9627<br>259.0098             | 1 : 2 | CPR<br>HPR – 1<br>HPR – 2<br>HPR – 3<br>CPR – 2<br>CPR – 3<br>CPR – 4 | 62.7*±4<br>< LOD<br>1.5*±0.05<br>4.1*±0.3<br><LOD<br><LOD<br><LOD       |
| Neoglucobrassicin                             | C <sub>17</sub> H <sub>22</sub> N <sub>2</sub> O <sub>10</sub> S <sub>2</sub> | 478.073  | 477.0657 | 96.9605<br>259.0131<br>446.0503 | 1 : 3 | CPR<br>HPR – 1<br>HPR – 2<br>HPR – 3<br>CPR – 2<br>CPR – 3<br>CPR – 4 | < LOQ<br>< LOD<br>1.9* ± 0.1<br>10.3* ± 0.2<br><LOD<br><LOD<br><LOD     |

|                                  |                                                |          |            |          |  |                                                                       |                                                                   |
|----------------------------------|------------------------------------------------|----------|------------|----------|--|-----------------------------------------------------------------------|-------------------------------------------------------------------|
| 4-Hydroxybutyl isothiocyanate    | C <sub>5</sub> H <sub>9</sub> NOS              | 131.0401 | 132.0470   | 132.0462 |  | CPR<br>HPR – 1<br>HPR – 2<br>HPR – 3<br>CPR – 2<br>CPR – 3<br>CPR – 4 | < LOQ<br>< LOD<br>< LOD<br>< LOD<br>< LOD<br>< LOD<br>< LOD       |
| Goitrin                          | C <sub>5</sub> H <sub>7</sub> NOS              | 129.0240 | 130.0310   | 130.0321 |  | CPR<br>HPR – 1<br>HPR – 2<br>HPR – 3<br>CPR – 2<br>CPR – 3<br>CPR – 4 | < LOD<br>< LOD<br>< LOD<br>< LOD<br>95 ± 7<br>7 ± 0.5<br>22 ± 1.5 |
| 4-Methylthiobutyl isothiocyanate | C <sub>6</sub> H <sub>11</sub> NS <sub>2</sub> | 161.032  | 179.0630** | 103.1010 |  | CPR<br>HPR – 1<br>HPR – 2<br>HPR – 3<br>CPR – 2<br>CPR – 3<br>CPR – 4 | < LOD<br>< LOD<br>< LOD<br>< LOD<br>< LOQ<br>< LOD<br>< LOD       |



|                              |                                  |          |            |          |  |                                                                       |                                                             |
|------------------------------|----------------------------------|----------|------------|----------|--|-----------------------------------------------------------------------|-------------------------------------------------------------|
| 2-Phenylethyl isothiocyanate | C <sub>9</sub> H <sub>9</sub> NS | 163.0449 | 181.0786** | 105.0695 |  | CPR<br>HPR – 1<br>HPR – 2<br>HPR – 3<br>CPR – 2<br>CPR – 3<br>CPR – 4 | < LOD<br>< LOD<br>< LOD<br>< LOD<br>< LOD<br>< LOQ<br>< LOD |
| 3-Butenyl isothiocyanate     | C <sub>5</sub> H <sub>7</sub> NS | 113.0290 | 131.0600** | 114.0328 |  | CPR<br>HPR – 1<br>HPR – 2<br>HPR – 3<br>CPR – 2<br>CPR – 3<br>CPR – 4 | < LOD<br>< LOD<br>< LOD<br>< LOD<br>< LOD<br>< LOQ<br>< LOD |

\*The results were expressed as sinigrin equivalents. \*\*NH<sub>4</sub> adduct. LOD for glucosinolates determination varied from 0.1 mg/kg to 0.37 mg/kg dried weight, while LOQ varied in the range from 1.0 mg/kg to 3.7 mg/kg dried sample. LOD for isothiocyanates determination varied from 0.07 mg/kg sample to 0.42 mg/kg sample, while LOQ varied from 0.7 mg/kg sample to 4.2 mg/kg dried sample.

**Table S3.** Identification of goitrin determined at different stages of pilot-scale protein extraction from cold-pressed rapeseed cake (CPR).

| Name of the compound | Formula                           | M        | [M-H] <sup>+</sup> | Fragment ion | Type of Sample | Concentrations (mg/kg d.w.) |
|----------------------|-----------------------------------|----------|--------------------|--------------|----------------|-----------------------------|
| Goitrin              | C <sub>5</sub> H <sub>7</sub> NOS | 129.0240 | 129.0240           | 130.3190     | S3             | 805 ± 6                     |
|                      |                                   |          |                    |              | S4             | 518 ± 36                    |
|                      |                                   |          |                    |              | S5             | 528 ± 37                    |
|                      |                                   |          |                    |              | S6             | 173 ± 12                    |

|  |  |  |  |  |    |          |
|--|--|--|--|--|----|----------|
|  |  |  |  |  | S7 | 493 ± 35 |
|  |  |  |  |  | S8 | 52 ± 4   |

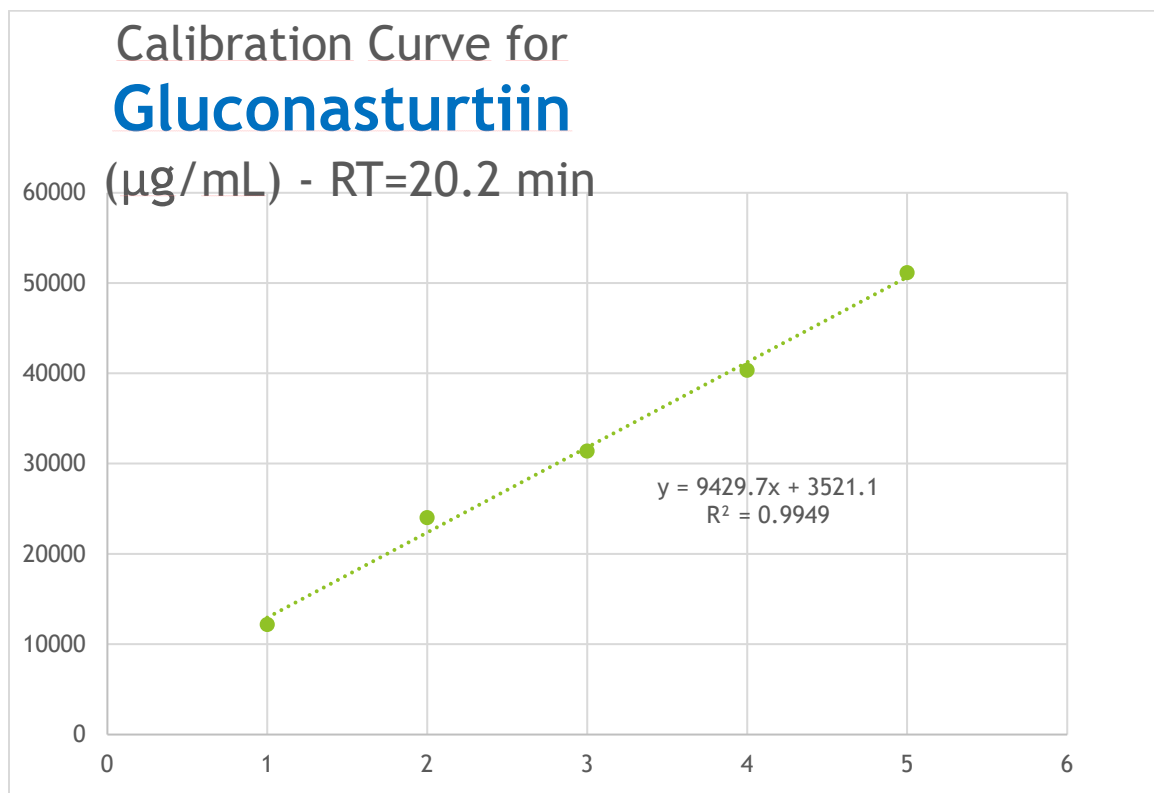

\* RT: retention time, y axis – abundances, x axis – concentrations in µg/mL of the spiked standard.

**Figure S1.** Calibration curve for gluconasturtiin.

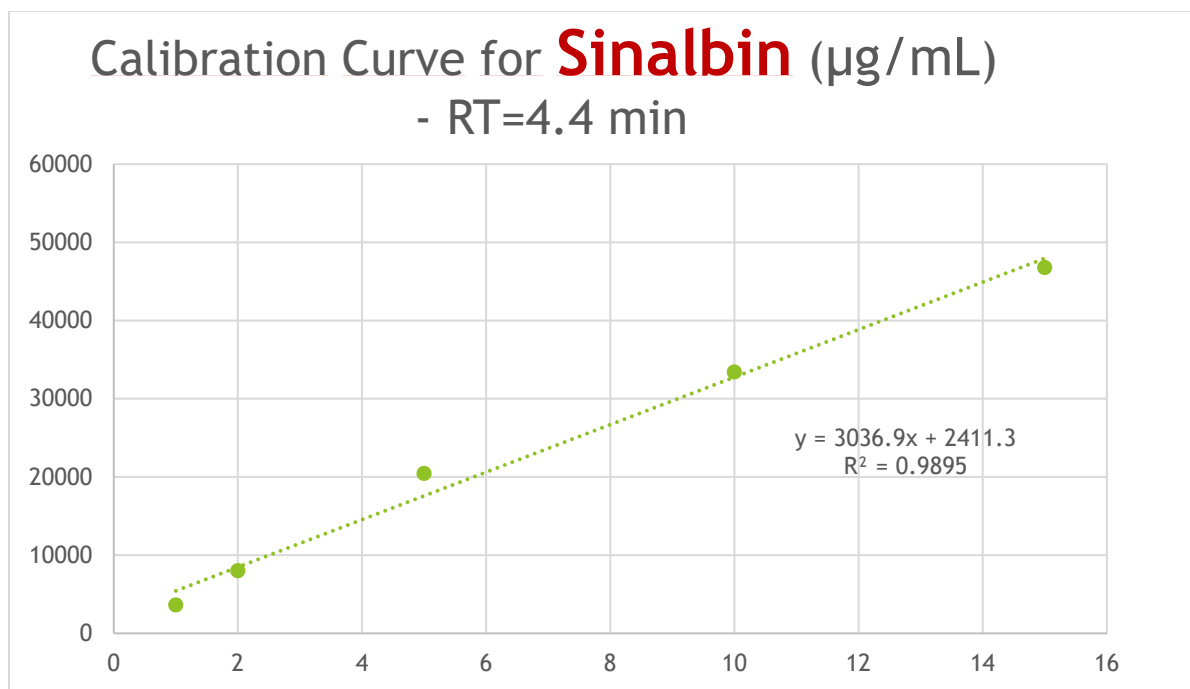

\* RT: retention time, y axis – abundances, x axis – concentrations in  $\mu\text{g/mL}$  of the spiked standard.

**Figure S2.** Calibration curve for determination of sinalbin.

## Calibration Curve for **Gluconapin**

( $\mu\text{g/mL}$ ) - RT=5.9 min

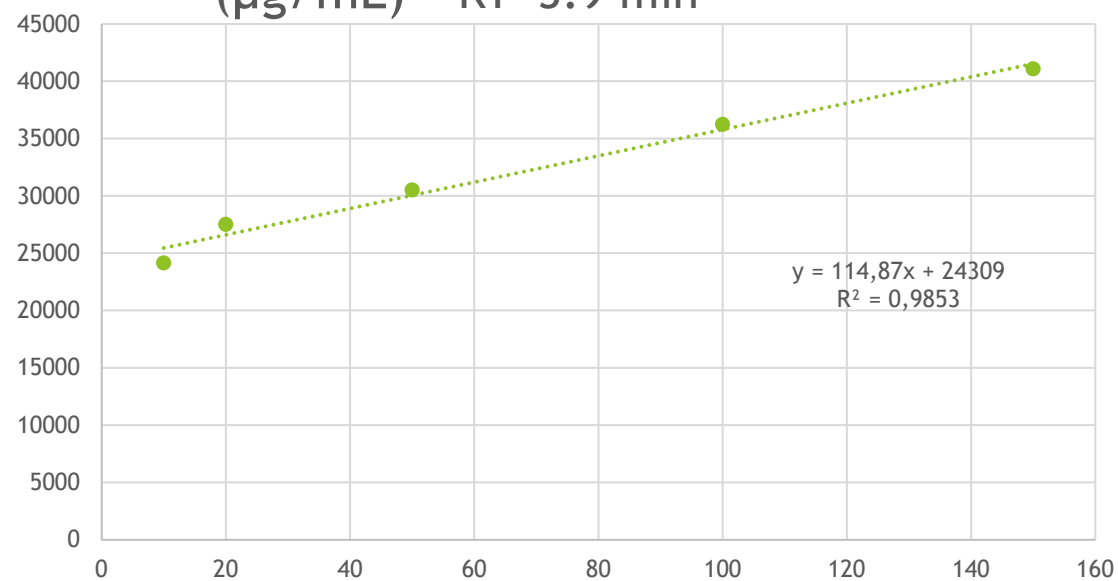

\* RT: retention time, y axis – abundances, x axis – concentrations in  $\mu\text{g/mL}$  of the spiked standard.

**Figure S3.** Calibration curve for determination of gluconapin.

## Calibration Curve for **Progoitrin** ( $\mu\text{g/mL}$ )- RT=2.3 min

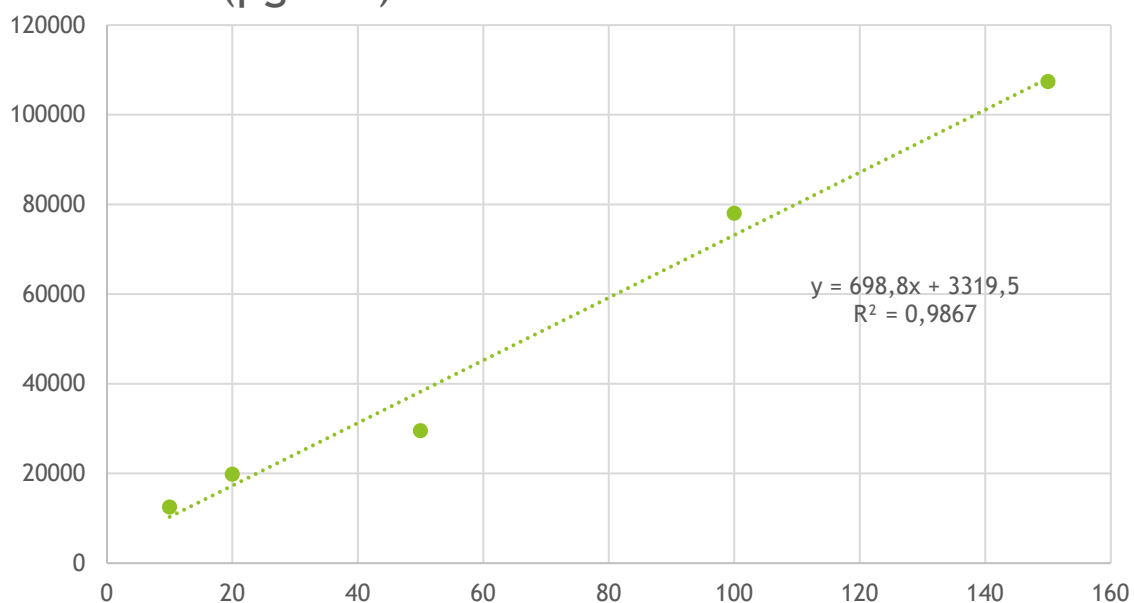

\* RT: retention time, y axis – abundances, x axis – concentrations in  $\mu\text{g/mL}$  of spiked standard.

**Figure S4.** Calibration curve for determination of progoitrin.

# Calibration Curve for Sinigrin ( $\mu\text{g/mL}$ ) - RT=2.9

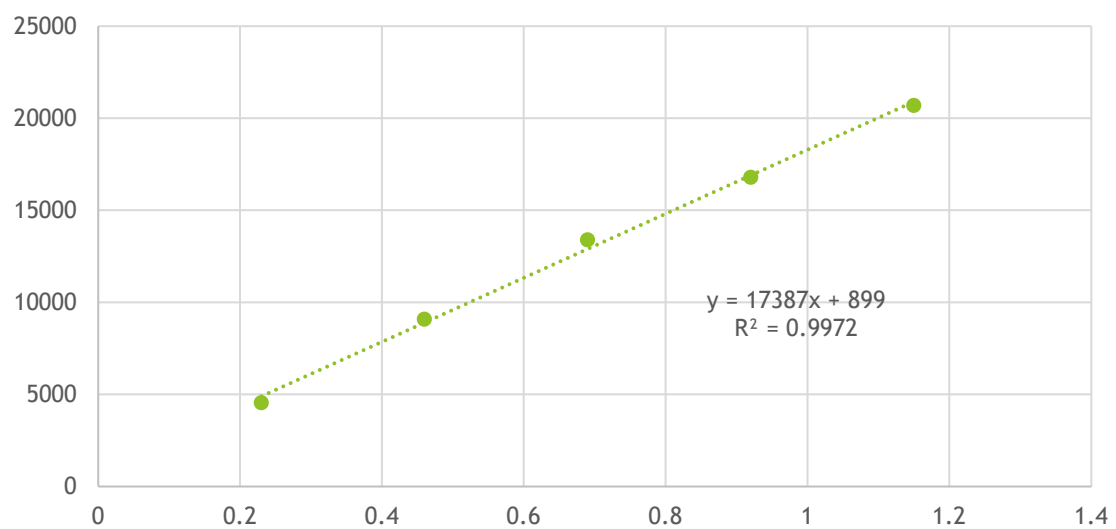

\* RT: retention time, y axis – abundances, x axis – concentrations in  $\mu\text{g/mL}$  of spiked standard.

**Figure S5.** Calibration curve for determination of sinigrin and other glucosinolates.
